# Supplementary material
Source: PubMed Central journal article supplement (PMC5824056)
Supplement: JCM.01504-17_zjm999095847s1.pdf [file JCM.01504-17_zjm999095847s1.pdf]

| Serum ID | Serum Category   | Location of Infection | Days post infection | FRNT50 |       |       |       |       |
|----------|------------------|-----------------------|---------------------|--------|-------|-------|-------|-------|
|          |                  |                       |                     | DENV1  | DENV2 | DENV3 | DENV4 | ZIKV  |
| DT168    | Primary ZIKV     | Brazil                | > 6 months          | 25     | <20   | 100   | <20   | 1258  |
| DT172    | Primary ZIKV     | Colombia              | 3 months            | <20    | <20   | <20   | <20   | 794   |
| DT206b   | Primary ZIKV     | Honduras              | 6 months            | <20    | <20   | <20   | <20   | 23388 |
| DT244b   | Primary ZIKV     | Puerto Rico           | 6 months            | <20    | <20   | <20   | <20   | 4860  |
| DT166    | Secondary ZIKV   | Brazil                | > 6 months          | 630    | 398   | 3981  | 316   | 1995  |
| ARB15    | Secondary ZIKV   | Brazil                | 6 months            | 1524   | 666   | 557   | 502   | 14959 |
| ARB24    | Secondary ZIKV   | Brazil                | 6 months            | 126    | 209   | 251   | 106   | 3918  |
| ARB14    | Secondary ZIKV   | Brazil                | 6 months            | 1524   | 666   | 557   | 502   | 14959 |
| ARB19    | Secondary ZIKV   | Brazil                | 8 months            | 1379   | 4218  | 2270  | 359   | 5213  |
| ARB17    | Secondary ZIKV   | Brazil                | 5 months            | 1348   | 1818  | 3047  | 537   | 2353  |
| DT147    | Primary DENV1    | Bolivia               | 2 years             | 1016   | 110   | 62    | 36    | N/A   |
| DT153    | Primary DENV1    | Guyana                | 5 years             | 288    | 69    | 58    | 32    | N/A   |
| DT118    | Primary DENV3    | Nicaragua             | 1 year              | 60     | 32    | 980   | 76    | N/A   |
| DT125    | Primary DENV3    | Paraguay              | 5 years             | 97     | 255   | 1080  | 49    | N/A   |
| ARB27    | Primary DENV2    | Brazil                | 8 months            | 205    | 1887  | 238   | 240   | <25   |
| DT033    | Primary DENV3    | India                 | >4 months           | 16     | 11    | 426   | 25    | N/A   |
| ARB16    | Secondary DENV   | Brazil                | 7 months            | 797    | 122   | 304   | 72    | <25   |
| ARB22    | Secondary DENV   | Brazil                | 6 months            | 89     | 308   | 473   | 82    | <25   |
| DT026    | Secondary DENV   | Dominican Republic    | 1.5 years           | 233    | 236   | 158   | 206   | N/A   |
| DT146    | Secondary DENV   | India                 | 1 year              | 174    | 439   | 830   | 918   | N/A   |
| DT141    | Secondary DENV   | Dominican Republic    | 8 years             | 752    | 845   | 302   | 144   | N/A   |
| DT160    | Secondary DENV   | Puerto Rico           | 1 year              | 343    | 1377  | 462   | 542   | N/A   |
| DT140    | Naïve human sera |                       |                     |        |       |       |       |       |
| DT127    | Naïve human sera |                       |                     |        |       |       |       |       |

\* Neutralization data is from a different time point, but does not change the serostatus interpretation.

**Table S1. Determination of flavivirus infection status of late convalescent serum specimens (collected >12 weeks post infection).** Serostatus of specimens were categorized into primary or secondary infection using neutralization assay as previously described (1). Serum that had neutralizing antibodies to any one serotype of DENV or to ZIKV with minimal cross-neutralizing antibodies were defined as primary flavivirus infections (meaning that the 50% inhibitory concentration [IC50] for a single DENV serotype or ZIKV was  $\geq 4$ -fold that of any other virus tested). In most cases, the person's travel history corroborated the primary immune status. Serum that had high levels of neutralizing antibody to  $\geq 2$  flaviviruses were defined as secondary (repeat) flavivirus infections. Most secondary infection samples were from persons who had resided in DENV- or ZIKV-endemic countries for  $\geq 5$  years.

| Serum ID    | Serum Category  | Location of Infection | Days post infection | PCR Confirmation | Dengue acute IE | Dengue convalescent IE |
|-------------|-----------------|-----------------------|---------------------|------------------|-----------------|------------------------|
| 5604.12.B.2 | Primary ZIKV    | Nicaragua             | 14                  | ZIKV             | 20              | 72                     |
| 5847.12.B.2 | Primary ZIKV    | Nicaragua             | 15                  | ZIKV             | 70              | 45                     |
| 5749.12.A.2 | Primary ZIKV    | Nicaragua             | 20                  | ZIKV             | 36              | <10                    |
| 8385.12.B.2 | Primary ZIKV    | Nicaragua             | 23                  | ZIKV             | <10             | 53                     |
| 7420.12.B.2 | Secondary ZIKV  | Nicaragua             | 14                  | ZIKV             | 47              | 31687                  |
| 4960.4.a    | Primary DENV2   | Nicaragua             | 14                  | DENV2            | <10             | 14                     |
| 1471.10.a   | Primary DENV2   | Nicaragua             | 15                  | DENV2            | <10             | <10                    |
| 1282.8.a    | Primary DENV3   | Nicaragua             | 15                  | DENV3            | <10             | 20                     |
| 3300.7.a    | Primary DENV3   | Nicaragua             | 15                  | DENV3            | <10             | 88                     |
| 5412.12.a   | Primary DENV2   | Nicaragua             | 15                  | DENV2            | <10             | 59                     |
| 9225.13.a   | Primary DENV2   | Nicaragua             | 16                  | DENV2            | <10             | 329                    |
| 278.4.b     | Primary DENV2   | Nicaragua             | 17                  | DENV2            | <10             | 112                    |
| 3451.5.a    | Primary DENV3   | Nicaragua             | 17                  | DENV3            | 19              | 450                    |
| 2651.7.a    | Primary DENV3   | Nicaragua             | 20                  | DENV3            | <10             | 813                    |
| 2983.7.a    | Primary DENV3   | Nicaragua             | 23                  | DENV3            | <10             | 24                     |
| 2538.4.a    | Secondary DENV2 | Nicaragua             | 15                  | DENV2            | 29              | 54738                  |
| 2551.9.a    | Secondary DENV1 | Nicaragua             | 15                  | DENV1            | 1370            | 49924                  |
| 3.9.A.a     | Secondary DENV1 | Nicaragua             | 15                  | DENV1            | 71              | 39515                  |
| 2453.4.a    | Secondary DENV2 | Nicaragua             | 15                  | DENV2            | 13              | 11986                  |
| 2845.6.a    | Secondary DENV3 | Nicaragua             | 15                  | DENV3            | 205             | >100000                |
| 2674.7.a    | Secondary DENV3 | Nicaragua             | 16                  | DENV3            | 1314            | >100000                |
| 2416.6.a    | Secondary DENV3 | Nicaragua             | 17                  | DENV3            | 1381            | >100000                |
| 2906.4.a    | Secondary DENV2 | Nicaragua             | 19                  | DENV2            | 34              | 28815                  |
| 304.4.A.a   | Secondary DENV2 | Nicaragua             | 20                  | DENV2            | 182             | 45923                  |

\*For ZIKV-immune sera, DENV PCR were negative.

**Table S2. Determination of flavivirus infection status of early convalescent serum specimens from Nicaragua (collected between 14 and 23 days post infection).** All the samples were confirmed by PCR testing. IE titers in paired (acute and convalescent) serum specimens were used to determine whether or not a case is primary or secondary infection.

| Serum ID | Serum Category  | Location of Infection | Days post infection | PCR Confirmation | Serology summary |           |
|----------|-----------------|-----------------------|---------------------|------------------|------------------|-----------|
|          |                 |                       |                     |                  | Acute IgM        | Acute IgG |
| GS0437-2 | Primary DENV1   | Sri                   | 11                  | DENV1            | Neg              | Neg       |
| GS0505-2 | Primary DENV1   | Sri                   | 19                  | DENV1            | Pos              | Neg       |
| GS0409-2 | Primary DENV1   | Sri                   | 24                  | DENV1            | Neg              | Neg       |
| GS0517-2 | Primary DENV1   | Sri                   | 30                  | DENV1            | Neg              | Neg       |
| GS0518-2 | Primary DENV1   | Sri                   | 30                  | DENV1            | Neg              | Neg       |
| GS0399-2 | Primary DENV1   | Sri                   | 60                  | DENV1            | Neg              | Neg       |
| GS0523-2 | Secondary DENV1 | Sri                   | 44                  | DENV1            | Neg              | Pos       |
| GS0402-2 | Secondary DENV4 | Sri                   | 12                  | DENV4            | Pos              | Pos       |
| GS0438-2 | Secondary DENV4 | Sri                   | 18                  | DENV4            | Pos              | Pos       |
| GS0504-2 | Secondary DENV1 | Sri                   | 23                  | DENV1            | Pos              | Pos       |
| GS0519-2 | Secondary DENV1 | Sri                   | 23                  | DENV1            | Pos              | Pos       |
| GS0509-2 | Secondary DENV1 | Sri                   | 34                  | DENV1            | Neg              | Pos       |
| GS0521-2 | Secondary DENV4 | Sri                   | 77                  | DENV4            | Neg              | Pos       |

**Table S3. Determination of flavivirus infection status of early convalescent serum specimens from Sri Lanka (collected between 11 and 77 days post infection).** Sri Lankan samples were confirmed by PCR and serology as primary or secondary DENV infections.

| Serum ID | Serum Category | Location of Infection | Days post infection | FRNT50 |       |       |       |       |
|----------|----------------|-----------------------|---------------------|--------|-------|-------|-------|-------|
|          |                |                       |                     | DENV1  | DENV2 | DENV3 | DENV4 | ZIKV  |
| LB17     | Secondary ZIKV | Colombia              | 70                  | 23119  | 16731 | 23115 | 6789  | 11369 |
| LB18     | Secondary ZIKV | Colombia              | 70                  | 27233  | 19378 | 18026 | 614   | 2483  |
| LB19     | Secondary ZIKV | Colombia              | 70                  | 14886  | 14702 | 15625 | 1490  | 35233 |
| LB20     | Secondary ZIKV | Colombia              | 70                  | 1155   | 5424  | 27366 | 215   | 5965  |
| LB22     | Secondary ZIKV | Colombia              | 70                  | 2897   | 7220  | 5640  | 3825  | 4948  |
| LB23     | Secondary ZIKV | Colombia              | 70                  | 13595  | 16678 | 10633 | 4426  | 6527  |

**Table S4. Determination of flavivirus infection status of early convalescent serum specimens from Colombia.** Serostatus of Colombian specimens were categorized into secondary infection because all the specimens had high levels of neutralizing antibody to ZIKV and DENV.

| Serum ID | Serum Category  | Location of Infection | Days post infection | Reactivity ratio (K394A) / (WT) |
|----------|-----------------|-----------------------|---------------------|---------------------------------|
| LB17     | Secondary ZIKV  | Colombia              | 70                  | 1.0                             |
| LB18     | Secondary ZIKV  | Colombia              | 70                  | 0.8                             |
| LB19     | Secondary ZIKV  | Colombia              | 70                  | 1.0                             |
| LB20     | Secondary ZIKV  | Colombia              | 70                  | 1.3                             |
| LB22     | Secondary ZIKV  | Colombia              | 70                  | 0.9                             |
| GS0505-2 | Primary DENV1   | Sri Lanka             | 19                  | 1.1                             |
| GS0409-2 | Primary DENV1   | Sri Lanka             | 24                  | 1.0                             |
| GS0399-2 | Primary DENV1   | Sri Lanka             | 60                  | 0.8                             |
| GS0402-2 | Secondary DENV1 | Sri Lanka             | 12                  | 0.9                             |
| GS0504-2 | Secondary DENV1 | Sri Lanka             | 23                  | 0.8                             |

**Table S5. Characteristics of Z-EDIII<sup>K394</sup> reactivity with early convalescent sera.** The reactivity ratio was calculated from the sandwich ELISA binding of Z-EDIII mutant (K394A) and wild-type Z-EDIII. K394 denotes the Z-EDIII protein in which the lysine residue at position 394 was replaced by alanine.

| Serum ID | Serum Category | Location of Infection | PCR Confirmation | Dengue acute IE | Dengue convalescent IE |
|----------|----------------|-----------------------|------------------|-----------------|------------------------|
| 1115     | Primary        | Nicaragua             | DENV3            | <10             | 27                     |
| 1117     | Primary        | Nicaragua             | DENV3            | <10             | 62                     |
| 1122     | Primary        | Nicaragua             | DENV3            | <10             | 22                     |
| 1128     | Primary        | Nicaragua             | DENV3            | <10             | <10                    |
| 1135     | Primary        | Nicaragua             | DENV3            | <10             | 186                    |
| 1136     | Primary        | Nicaragua             | DENV3            | <10             | 132                    |
| 1143     | Primary        | Nicaragua             | DENV3            | 18              | 662                    |
| 1149     | Primary        | Nicaragua             | DENV3            | <10             | 1084                   |
| 1130     | Secondary      | Nicaragua             | DENV3            | 293             | >100000                |
| 1133     | Secondary      | Nicaragua             | DENV3            | 61              | 7469                   |
| 1132     | Secondary      | Nicaragua             | DENV3            | 302             | 82656                  |
| 1134     | Secondary      | Nicaragua             | DENV3            | 3782            | 45789                  |
| 1124     | Secondary      | Nicaragua             | DENV3            | 37              | 22478                  |
| 1142     | Secondary      | Nicaragua             | DENV3            | 265             | >100000                |
| 1110     | Secondary      | Nicaragua             | DENV3            | 30              | 28118                  |
| 1127     | Secondary      | Nicaragua             | DENV3            | 9014            | 15012                  |
| 1114     | Secondary      | Nicaragua             | DENV3            | 7459            | 64390                  |
| 1095     | Secondary      | Nicaragua             | DENV3            | 130             | >100000                |
| 1101     | Secondary      | Nicaragua             | DENV3            | 1890            | 16492                  |
| 1085     | Secondary      | Nicaragua             | DENV3            | 364             | 3467                   |
| 1086     | Secondary      | Nicaragua             | DENV3            | 3741            | >100000                |
| 1083     | Secondary      | Nicaragua             | DENV3            | 150             | 43260                  |
| 1187     | Secondary      | Nicaragua             | DENV3            | 150             | 13361                  |
| 1178     | Secondary      | Nicaragua             | DENV3            | 33              | 58126                  |

**Table S6. Determination of flavivirus infection status of longitudinal specimens from Nicaraguan patients who had been infected with DENV.** All the samples were confirmed by PCR testing. IE titers in paired (acute and convalescent) serum specimens were used to determine whether or not a case is primary or secondary infection.

## REFERENCE

1. Collins MH, McGowan E, Jadi R, Young E, Lopez CA, Baric RS, Lazear HM, de Silva AM. 2017. Lack of Durable Cross-Neutralizing Antibodies Against Zika Virus from Dengue Virus Infection. *Emerg Infect Dis* 23:773-781.
