# Supplementary material
Source: PubMed Central journal article supplement (PMC5824056)
Supplement: JCM.01504-17_zjm999095847s2.pdf [file JCM.01504-17_zjm999095847s2.pdf]

Fig. S1

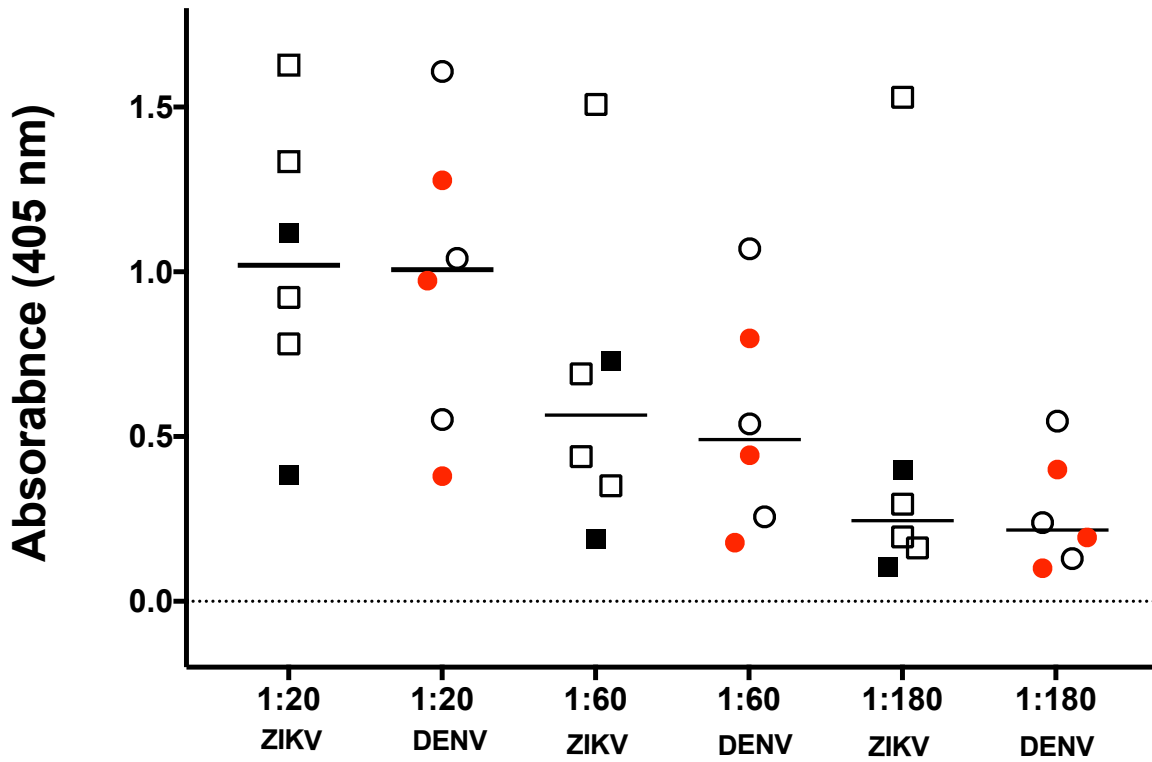

**Effect of serum dilution on the specificity of Z-EDIII reactivity with early convalescent sera from patients infected with ZIKV, and/or DENV.** Primary (filled symbols) and secondary (unfilled symbols) human serum samples were diluted at 1:20, 1:60 or 1:180 and the bound IgG Abs to Z-EDIII was measured using sandwich ELISA as described in the methods section. Primary DENV1 sera are shown as red filled circle.
